# Supplementary material
Source: PubMed Central journal article supplement (PMC6086382)
Supplement: NIHMS942950-supplement-1.pdf [file NIHMS942950-supplement-1.pdf]

## MRI Studies Reporting Summary

Form fields will expand as needed. Please do not leave fields blank.

### ▶ Experimental design

1. Describe the experimental design.
2. Specify the number of blocks, trials or experimental units per session and/or subject, and specify the length of each trial or block (if trials are blocked) and interval between trials.
3. Describe how behavioral performance was measured.

### ▶ Acquisition

4. Imaging
  - a. Specify the type(s) of imaging.
  - b. Specify the field strength (in Tesla).
  - c. Provide the essential sequence imaging parameters.
  - d. For diffusion MRI, provide full details of imaging parameters.
5. State area of acquisition.

### ▶ Preprocessing

6. Describe the software used for preprocessing.
7. Normalization
  - a. If data were normalized/standardized, describe the approach(es).
  - b. Describe the template used for normalization/transformation.
8. Describe your procedure for artifact and structured noise removal.
9. Define your software and/or method and criteria for volume censoring, and state the extent of such censoring.

### ▶ Statistical modeling & inference

10. Define your model type and settings.
11. Specify the precise effect tested.

12. Analysis

a. Specify whether analysis is whole brain or ROI-based.

ROI data were plotted for analysis with whole slices presented for display.

b. If ROI-based, describe how anatomical locations were determined.

ROIs were chosen algorithmically based on post stimulus signal change. They were not biased to the area of probe injection.

13. State the statistic type for inference.

(See [Eklund et al. 2016](#).)

n/a

14. Describe the type of correction and how it is obtained for multiple comparisons.

n/a

15. Connectivity

a. For functional and/or effective connectivity, report the measures of dependence used and the model details.

n/a

b. For graph analysis, report the dependent variable and functional connectivity measure.

n/a

16. For multivariate modeling and predictive analysis, specify independent variables, features extraction and dimension reduction, model, training and evaluation metrics.

n/a
